# Supplementary material
Source: PubMed Central journal article supplement (PMC5330654)
Supplement: ja6b12971_si_001.pdf [file ja6b12971_si_001.pdf]

Supplementary Information for

**Control of Electrons' Spin Eliminates Hydrogen Peroxide Formation  
During Water Splitting**

Wilbert Mtangi<sup>1</sup>, Francesco Tassinari<sup>1</sup>, Kiran Vankayala<sup>1</sup>, Andreas Vargas Jentsch<sup>2</sup>,  
Beatrice Adelizzi<sup>2</sup>, Anja R.A. Palmans<sup>2</sup>, Claudio Fontanesi<sup>3</sup>, E.W. Meijer\*<sup>2</sup>, Ron  
Naaman\*<sup>1</sup>

<sup>1</sup>Department of Chemical Physics, Weizmann Institute of Science, Rehovot 76100, Israel;

<sup>2</sup>Institute for Complex Molecular Systems, Eindhoven University of Technology,  
Eindhoven, the Netherlands;

<sup>3</sup>Department of Engineering, University of Modena and Reggio Emilia, Via Vivarelli 10,  
41125 Modena, Italy

**This file includes:**

**Methods**

**Figs. S1 to S14**

**Table S1**

**References**

## Contents

|                                                              |     |
|--------------------------------------------------------------|-----|
| <i>Synthesis of Molecules:</i> .....                         | S3  |
| Scheme S1: .....                                             | S3  |
| Scheme S2: .....                                             | S3  |
| <i>Preparation of TiO<sub>2</sub> electrodes</i> .....       | S4  |
| <i>Functionalization of TiO<sub>2</sub> electrodes</i> ..... | S4  |
| <i>Photoelectrochemical measurements</i> .....               | S5  |
| <i>Mott-Schottky measurements</i> .....                      | S5  |
| <i>Conductive AFM measurements</i> .....                     | S6  |
| <i>Hydrogen peroxide quantification</i> .....                | S7  |
| Figure S1 .....                                              | S8  |
| Figure S2 .....                                              | S9  |
| Figure S3 .....                                              | S10 |
| Figure S4 .....                                              | S11 |
| Figure S5 .....                                              | S12 |
| Figure S6 .....                                              | S13 |
| Figure S7 .....                                              | S14 |
| Figure S8 .....                                              | S15 |
| Figure S9 .....                                              | S16 |
| Figure S10 .....                                             | S17 |
| Figure S11 .....                                             | S18 |
| Figure S12: .....                                            | S19 |
| Figure S13 .....                                             | S20 |
| Figure S14 .....                                             | S21 |
| Table S1 .....                                               | S22 |
| References: .....                                            | S23 |

## Materials and Methods:

### Synthesis of Molecules:

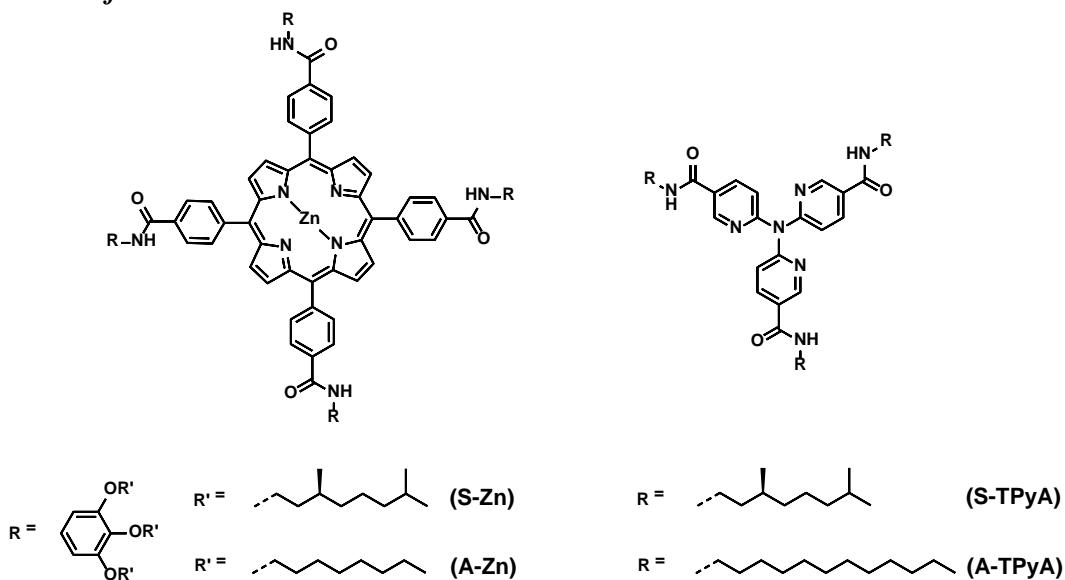

**Scheme S1:** Molecular structure of chiral and achiral Zn-porphyrins (*S*-Zn and *A*-Zn respectively) and tri(pyrid-2-yl)amine trisamide (*S*-TPyA and *A*-TPyA)

Achiral and chiral Zn-porphyrins were synthesized following the procedure reported by Helmich et al.<sup>1,2</sup> Achiral and chiral tri(pyrid-2-yl)amine trisamides were synthesized from the carboxylic acid precursor as follows.<sup>3,4</sup>

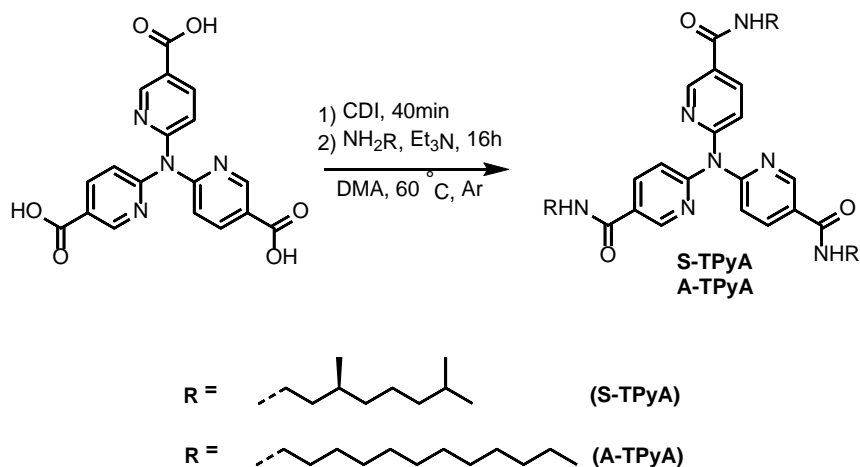

**Scheme S2:** Amide coupling of TPyA with achiral (*A*-TPyA) and (*S*)-chiral chains (*S*-TPyA)

### ***Preparation of TiO<sub>2</sub> electrodes***

TiO<sub>2</sub> nanoparticulate films were deposited on fluorine-doped tin oxide, FTO (surface resistivity of ~7 Ω/sq.) coated glass, purchased from Sigma Aldrich Co., using the electrophoretic deposition (EPD) technique. This technique has been used previously to deposit TiO<sub>2</sub> nanoparticles.<sup>5</sup> A suspension of TiO<sub>2</sub> nanoparticles (NPs) was prepared by dispersing 0.4g TiO<sub>2</sub> NPs (<25nm in diameter and 99.7% trace metals, purchased from Sigma Aldrich Co.) in 40 mL of de-ionized water. Prior to making dispersions, TiO<sub>2</sub> nanoparticle powders were heated at 570 K for 1 h. The mixture was stirred overnight to ensure homogeneity. Prior to nanoparticle deposition, the FTO substrates were boiled in isopropanol for 15 minutes, followed by 15 minutes of boiling in ethanol, and finally rinsed with de-ionized water. After rinsing, the substrates were dried using nitrogen gas and annealed for 15 minutes at T=570 K. EPD was then performed with a Princeton potentiostat using the galvanic pulses mode technique with two pulses (Pulse 1 and Pulse 2). Pulse 1 was set to 0 mA for 200 ms for depolarization. Pulse 2 was varied between 0.50 to 0.95 mA to obtain a maximum potential of 10.0 V. Pulse 2 was applied for 1000 ms in each cycle for polarization, and the number of iterations (pulse 1 followed by pulse 2) was set to 1500. Various cycles were used to prepare films of required thicknesses. The samples were annealed in between cycles at 570 K for 15 minutes in air. During EPD, the suspension was continuously stirred using a magnetic stirrer. After completion of the last cycle, the electrodes were annealed again for 8 h at 570 K.

To confirm the surface coverage of the EPD-deposited TiO<sub>2</sub> NP on FTO, high-resolution scanning electron microscope (SEM) measurements were performed using In-lens-detector imaging with a LEO-Supra 55 VP. The SEM images in Figure S1 show a high surface coverage of the TiO<sub>2</sub> NP on FTO substrates deposited using the EPD technique. An average film thickness of around 5.0 μm was measured, using a Dektak stylus profilometer.

### ***Functionalization of TiO<sub>2</sub> electrodes***

TiO<sub>2</sub> electrodes were functionalized with chiral and achiral Zn-porphyrins by drop casting 30μL of the porphyrin solutions on a 1.5 cm<sup>2</sup> area and leaving them overnight to dry under dark and controlled humidity conditions. The porphyrin solutions were made from

porphyrin powders dissolved in methylcyclohexane (MCH) to a concentration of  $1.7 \times 10^{-5} M$ . Absorbance measurements were conducted on these solutions to confirm the formation of supramolecular structures. The 390 nm absorption peak in Figure S2 confirms the formation of stacks in solution for both the chiral and achiral Zn-porphyrins. Structural characterization of the TiO<sub>2</sub> modified electrodes was performed using SEM. Zn-porphyrins form supramolecular structures with lengths of approximately 1  $\mu m$  on the TiO<sub>2</sub> substrate surfaces. The functionalization of the TiO<sub>2</sub> electrodes with TPyA molecules was done by dropcasting 150  $\mu L$  of a  $2.3 \times 10^{-5} M$  solution on 1.5 cm<sup>2</sup> substrate surfaces and leaving them to dry overnight. The solutions were prepared by dissolving the TPyA molecules in MCH. To ensure the formation of aggregates, the solutions were warmed up to 368 K and cooled down to room temperature at a rate of 1 Kmin<sup>-1</sup>.

#### ***Photoelectrochemical measurements***

Photoelectrochemical measurements were conducted in a three-electrode cell, with an Ag/AgCl (saturated KCl) electrode as the reference and a Pt wire as the cathode. A 0.1 M Na<sub>2</sub>SO<sub>4</sub> (pH = 6.56) aqueous solution was used as the electrolyte. The activity of the photoelectrodes was characterized by measuring the open circuit potential, OCP in the dark and under illumination at zero current. For the measurements on the Zn-porphyrins modified electrodes, a commercial Xe lamp with an intensity of 80 mWcm<sup>-2</sup> was used. For the measurements on the TPyA modified electrodes, a mercury lamp with an intensity of 110 mWcm<sup>-2</sup> was used. The electrodes show a huge response to the illumination, confirming their photo-activities (Figure S5). The response of the photoelectrodes was also examined using linear scan voltammetry by switching the light on and off. It's interesting to note that these photoelectrodes have very high sensitivity to illumination (Figure S6).

#### ***Mott-Schottky measurements***

The electronic properties of the photoelectrodes were characterized using Mott-Schottky measurements (Figure S7). The measurements were performed in the dark, while sweeping potentials from -0.60 to 0.60 V versus the Ag/AgCl reference electrode. An AC voltage with amplitude of 20 mV was superimposed onto the DC voltages in the defined potential window with frequencies ranging from 200 Hz – 200 kHz. 0.1 M Na<sub>2</sub>SO<sub>4</sub> was used as the

electrolyte with a Pt wire as the counter electrode. The flat band potential of each modified electrode was determined by fitting the lower linear part of the data to the equation,

$$\frac{1}{C^2} = \frac{2}{\epsilon\epsilon_0qN_D} \left( E - V_{bi} - \frac{kT}{q} \right),$$

where  $C$  is the capacitance,  $N_D$  is the net doping density of  $\text{TiO}_2$  which can be calculated from the gradient,  $E$  is the applied potential, and  $V_{bi}$  is the flat band potential. The flat band potential was obtained as an intercept to the horizontal axis where  $1/C^2 = 0$ . The flat band potential was obtained as -0.51 V versus Ag/AgCl for both the chiral and achiral Zn-porphyrins modified electrodes, and as -0.70 V versus Ag/AgCl for both the chiral and achiral TPYA modified electrodes. This indicates that the electronic properties of the  $\text{TiO}_2$  are not affected by molecular modification for each class of molecules used in this study.

### ***Conductive AFM measurements***

Samples for magnetic conductive probe atomic force microscopy (mCP-AFM) measurements were prepared by drop-casting 5  $\mu\text{L}$  solutions of chiral/achiral Zn-porphyrin aggregates onto freshly cleaved highly oriented pyrolytic graphite (HOPG) substrate and dried under controlled humidity. The AFM images obtained from the drop-casted Zn porphyrins on highly oriented pyrolytic graphite, HOPG substrates are shown in Figure S8. Large area topography scans were recorded in PeakForce TUNA (PF-TUNA) mode prior to I-V spectroscopy measurements. I-V measurements were carried out using Multimode AFM with Nanoscope V controller (Bruker-Nano, Santa Barbara, CA, U.S.A.). I-V spectroscopy measurements were performed by recording voltage ramps at an applied force of 12 nN, with which the tip contacts the surface. For each spectroscopy measurement the tip was retracted and placed in a new position, which prevents the damage to the sample by the tip. A total of around 2 % of the traces were shorts and 5-8 % of the traces show insulating behavior which were not considered for the analysis. Around 50 I-V traces were recorded and averaged for each magnetic field orientation (Magnet UP and DOWN). A magnetic Fe tip (MESP-LC, Bruker) with nominal spring constant 2.8 N/m was used to acquire I-V curves. The tips are magnetized using a permanent magnet.<sup>6,7</sup> The force constant of each probe used was calibrated using the thermal tune procedure of the software.

### ***Hydrogen peroxide quantification***

Seven different sets of electrodes were used during this experiment; bare TiO<sub>2</sub>, TiO<sub>2</sub> modified with A-Zn (achiral porphyrin), S-Zn (chiral porphyrin), A-TPyA (achiral tripyridylamine), S-TPyA (chiral tripyridylamide), mercaptopropionic acid, MPA and an oligopeptide, A17. In this case, MPA and A17 were chosen so as to comprehend the observations obtained with the supramolecular aggregates.

Electrochemistry in the chronoamperometry mode was performed with a 0.1 M Na<sub>2</sub>SO<sub>4</sub> aqueous solution as the electrolyte and an Ag/AgCl (saturated KCl) reference electrode. A potential was chosen and applied to the bare TiO<sub>2</sub> electrode so that hydrogen and oxygen were evolved on the Pt and working electrodes, respectively. Bubbles were observed on both the Pt and TiO<sub>2</sub> electrode during the electrochemical measurements. Chronoamperometry measurements were conducted for 40 minutes. The presence of hydrogen peroxide was verified in a colorimetric test titration experiment of the used electrolyte, with o-tolidine as a redox indicator. For the colorimetric measurements, 0.8 mL of an o-tolidine solution prepared according to the Elmms-Hauser method<sup>8</sup> (purchased from Sigma Aldrich Co.) were added to 4 mL of the electrolyte solution obtained from the electrochemical cell and left to react for 30 minutes. In the presence of H<sub>2</sub>O<sub>2</sub> a yellow colour was observed with an absorption peak at around 436 nm from UV-vis absorption spectroscopy. To estimate the concentration of the hydrogen peroxide produced during electrochemical measurements within a specified period of time, a calibration curve was determined using 30% w/w commercial H<sub>2</sub>O<sub>2</sub>. Figure S14 shows a calibration curve for the concentration of commercial hydrogen peroxide. Results of the calculated concentrations are presented in Table S1. Interesting enough, in the case where chiral molecules were used, no hydrogen peroxide was detected.

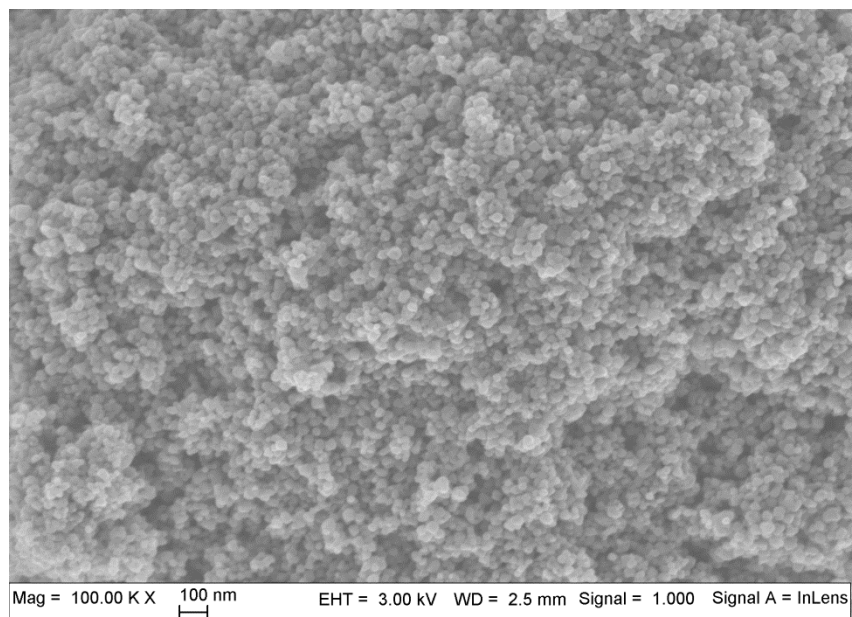

**Figure S1:** SEM images of EPD TiO<sub>2</sub> nanoparticles on FTO.



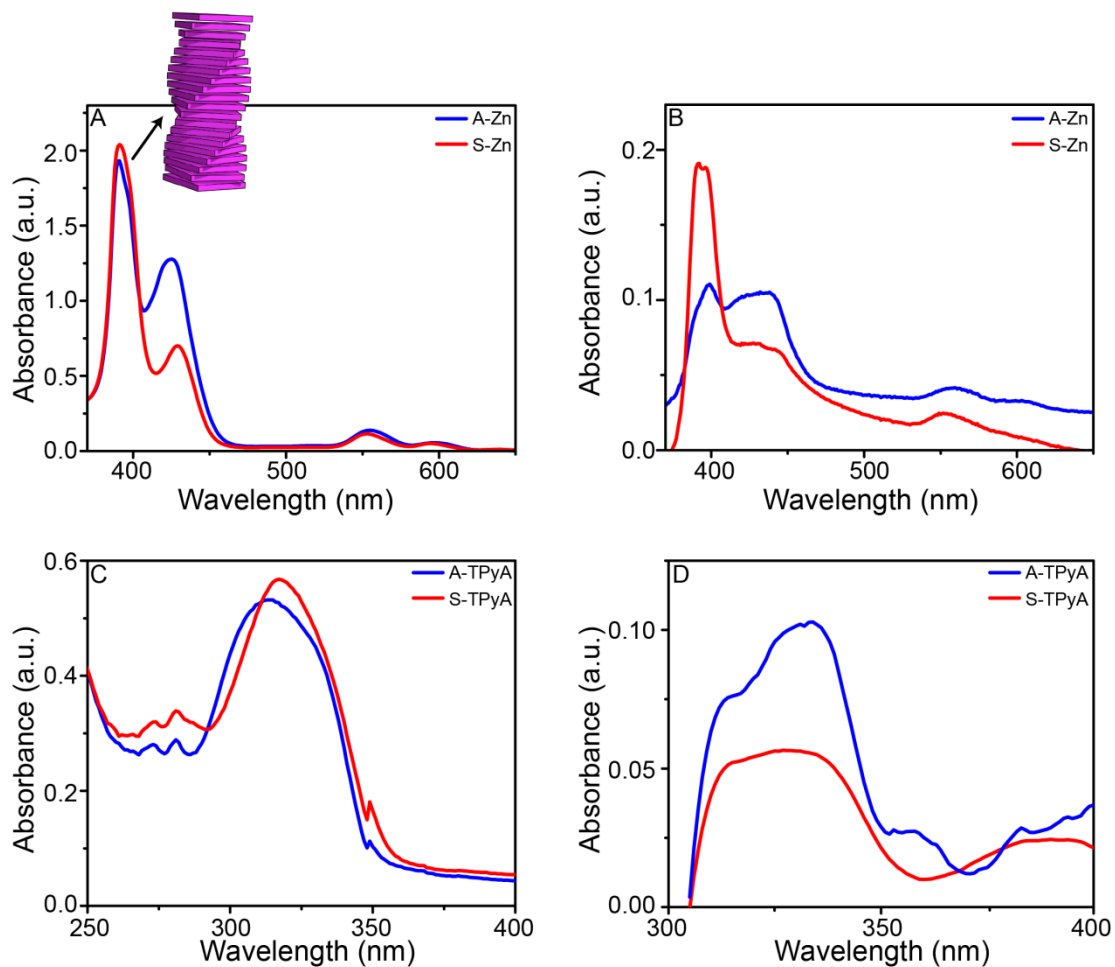

**Figure S2:** UV-vis spectra, red lines represent chiral analogues, blue lines represent achiral analogues. Zn-porphyrin spectra (A) in MCH ( $c = 1.7 \times 10^{-5}$  M) and on modified TiO<sub>2</sub> substrate (B). TPyAs spectra (C) in MCH ( $c = 2.3 \times 10^{-5}$  M) and on modified FTO substrate (D).

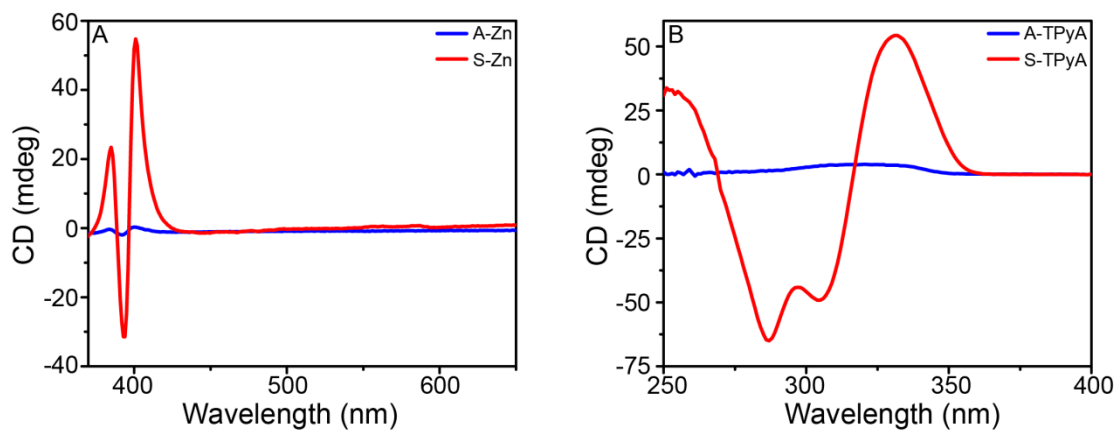

**Figure S3:** CD spectra of Zn-porphyrin (**A**) ( $c = 1.7 \times 10^{-5}$  M) and (**B**) TPyA ( $c = 2.3 \times 10^{-5}$  M) in MCH.

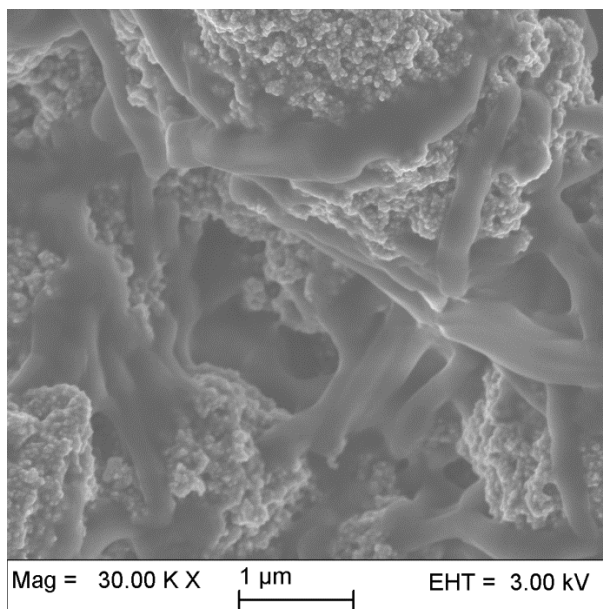

**Figure S4:** SEM obtained from the Zn-porphyrin molecule modified TiO<sub>2</sub> electrode.

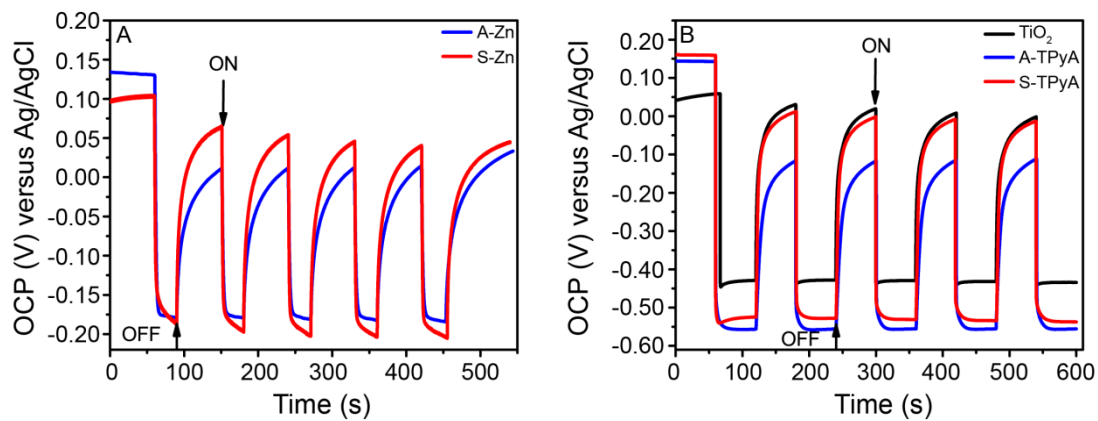

**Figure S5:** The OCP under dark and illumination as a function of time obtained from the chiral (red) and achiral (blue), **(A)** Zn-porphyrins and **(B)** TPyA modified TiO<sub>2</sub> electrodes. Black line represents the bare TiO<sub>2</sub> measurement.

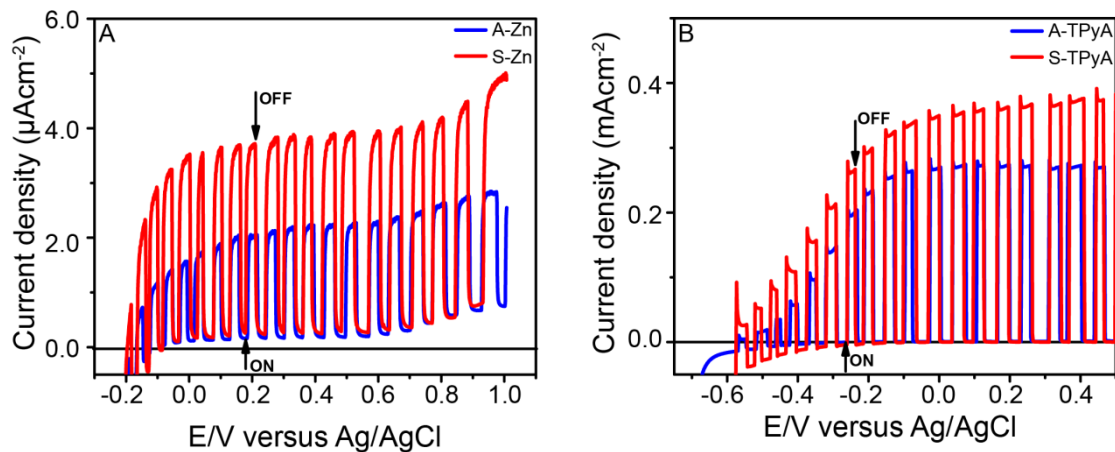

**Figure S6:** The current density as a function of the potential vs. the Ag/AgCl electrode, when the TiO<sub>2</sub> electrode is coated with self-assembled Zn-porphyrins (**A**) or with self-assembled TPyA (**B**) of either achiral (blue) or chiral (red) stacks. The measurements were performed at a scan rate of 10 mVs<sup>-1</sup> by switching the light ON and OFF.

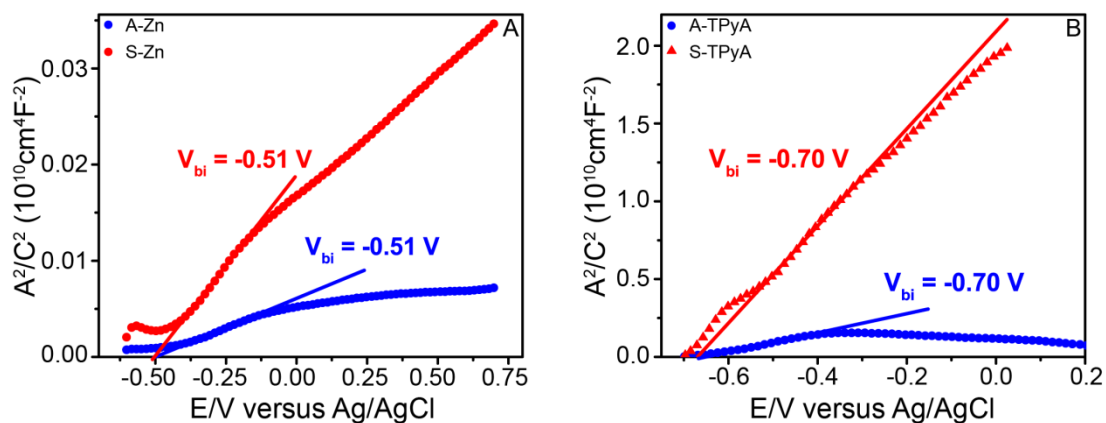

**Figure S7:** Mott-Schottky measurements obtained from a  $\text{TiO}_2$  electrode coated with Zn-porphyrins (**A**) and TPyAs (**B**). Achiral analogues reported with blue symbols, chiral analogues with red symbols. The measurements were performed at a frequency of 1.99 kHz with an oscillation voltage of 20 mV, in the dark. The linear fits determine the flat band potential by the intercept with the E axis.

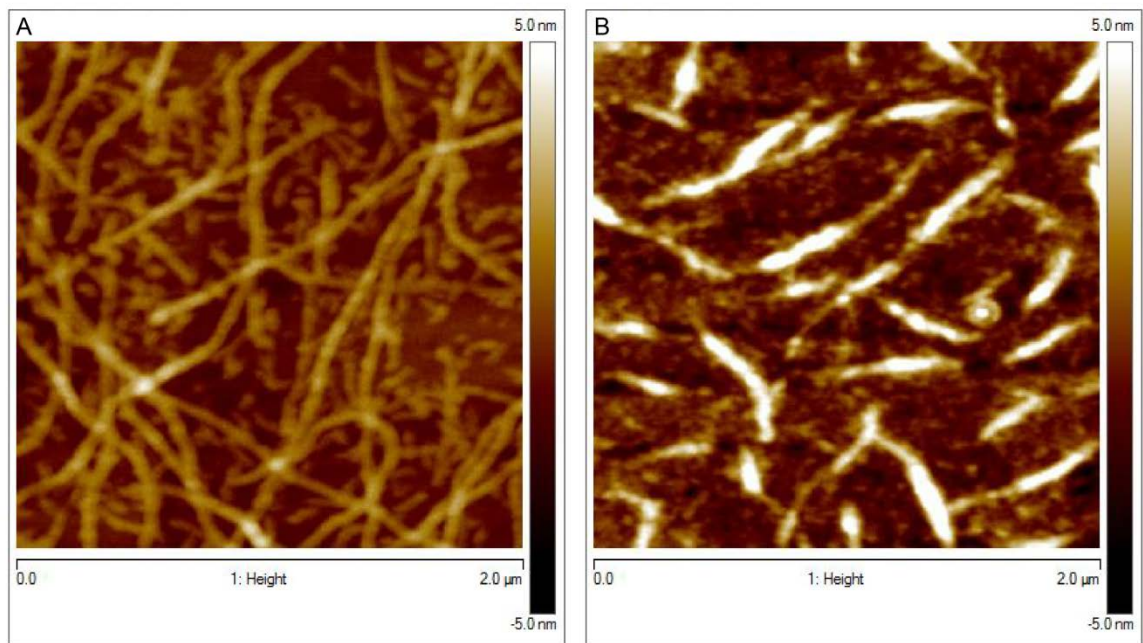

**Figure S8:** AFM images obtained from chiral (A) and achiral (B) Zn-porphyrins on HOPG

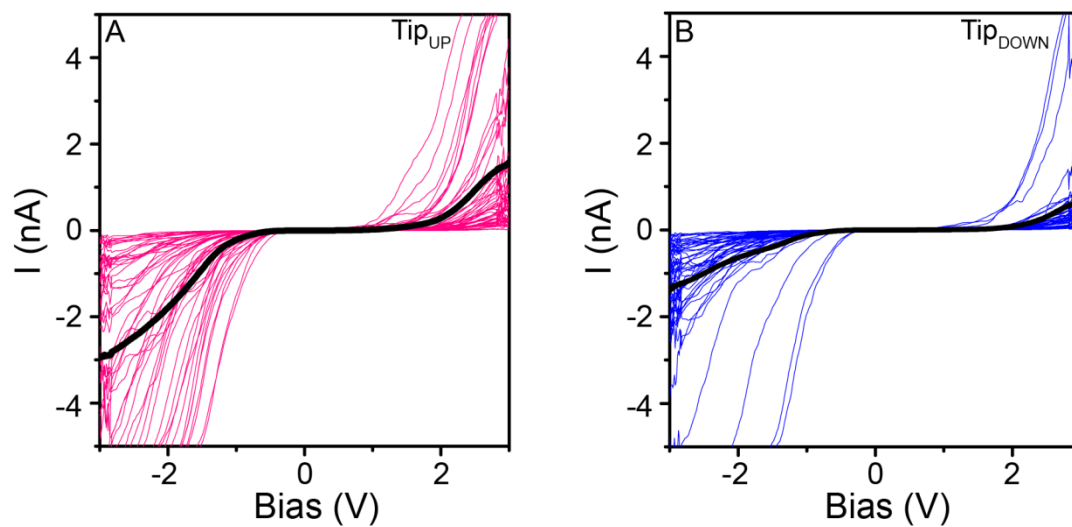

**Figure S9:** I-V curves obtained from chiral Zn-porphyrins using conductive probe AFM (color traces show individual measurements and the black trace shows the average).



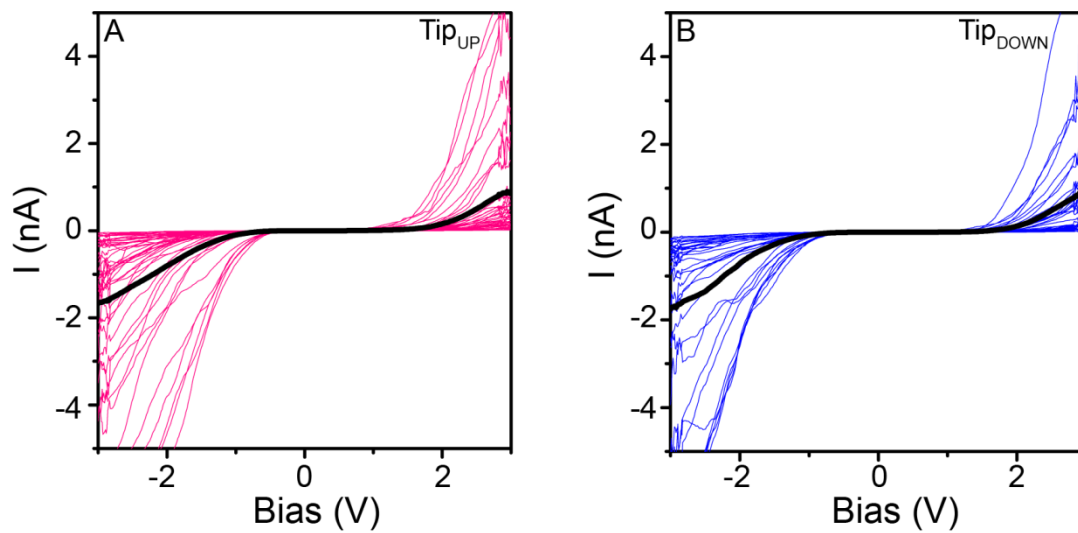

**Figure S10:** I-V curves obtained from achiral Zn-porphyrins using conductive probe AFM (color traces show individual measurements and the black trace shows the average).

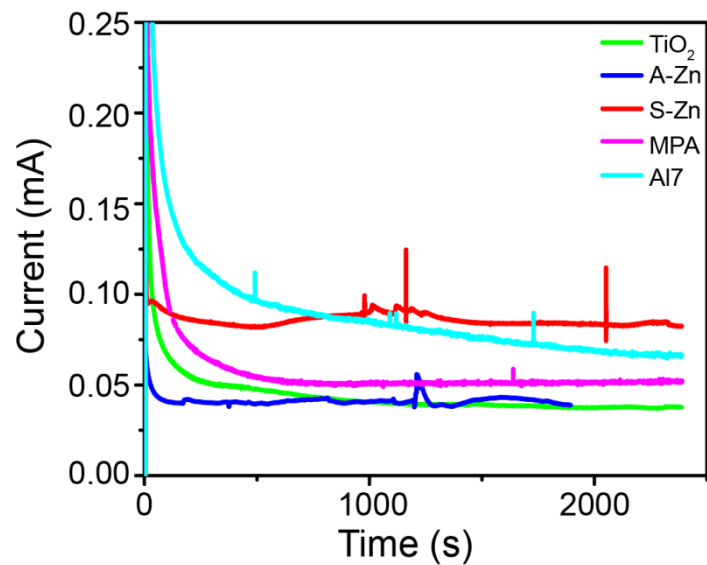

**Figure S11:** Current density as a function of time, on bare TiO<sub>2</sub> (green line) and when the TiO<sub>2</sub> electrode is coated with self-assembled Zn-porphyrins either achiral (blue line) or chiral (red line), MPA (magenta line) and Al7 (cyan line) to quantify the amount of hydrogen peroxide produced. The measurements were performed at 1.6 V versus Ag/AgCl.

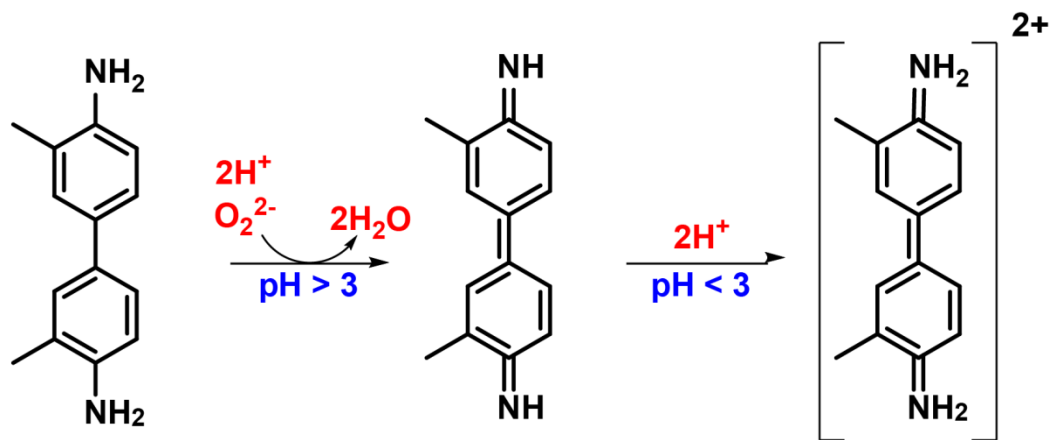

**Figure S12:** Reaction scheme between  $\text{H}_2\text{O}_2$  and o-tolidine, spectrophotometric redox indicator.

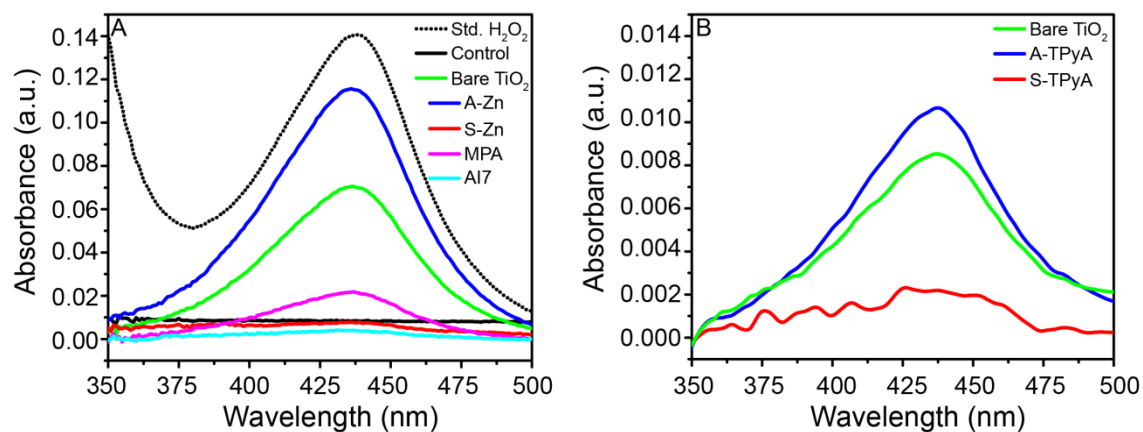

**Figure S13:** UV-vis absorption spectra from the titration with *o*-tolidine of the used electrolytes (0.1 M Na<sub>2</sub>SO<sub>4</sub>) after 40 min irradiation on functionalized TiO<sub>2</sub> electrodes with A-Zn, (A, blue line), S-Zn (A, red line), MPA (A, magenta line), Al7 (A, cyan line), A-TPyA (B, blue line), S-TPyA (B, red line), bare TiO<sub>2</sub> (green lines), The control refers to the titration of unused 0.1 M Na<sub>2</sub>SO<sub>4</sub> with *o*-tolidine. The absorption using commercial H<sub>2</sub>O<sub>2</sub> (A, dotted black line) is shown for reference.

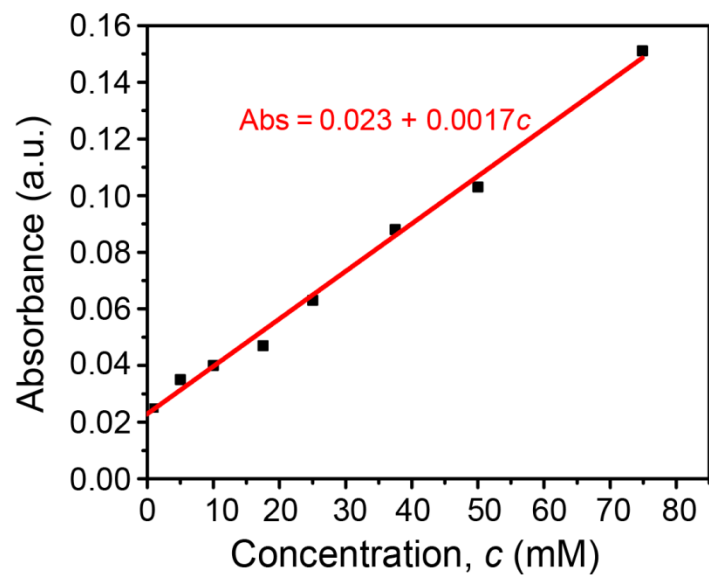

**Figure S14:** Calibration curve for the concentration of commercial hydrogen peroxide.

**Table S1:** Concentration of H<sub>2</sub>O<sub>2</sub> calculated from the electrolyte solutions used in electrochemistry with TiO<sub>2</sub> coated with different molecules.

| <b>Molecule used to coat electrode</b> | <b>H<sub>2</sub>O<sub>2</sub> Concentration (mmolL<sup>-1</sup>)</b> |
|----------------------------------------|----------------------------------------------------------------------|
| A-Zn                                   | 42.7 ± 5                                                             |
| Bare TiO <sub>2</sub>                  | 22.3 ± 4                                                             |
| MPA                                    | 2.7 ± 0.5                                                            |
| A-TPyA                                 | -                                                                    |
| S-TPyA                                 | -----                                                                |
| S-Zn                                   | -----                                                                |
| Al7                                    | -----                                                                |

## References:

- (1) Helmich, F.; Lee, C. C.; Nieuwenhuizen, M. M. L.; Gielen, J. C.; Christianen, P. C. M.; Larsen, A.; Fytas, G.; Leclère, P. E. L. G.; Schenning, A. P. H. J.; Meijer, E. W. *Angew. Chem. Int. Ed.* **2010**, *49*, 3939–3942.
- (2) Helmich, F.; Lee, C. C.; Schenning, A. P. H. J.; Meijer, E. W. *J. Am. Chem. Soc.* **2010**, *132* (47), 16753–16755.
- (3) Szelke, H.; Wadepohl, H.; Abu-youssef, M.; Krämer, R. **2009**, No. Scheme 1, 251–260.
- (4) Adelizzi, B. Filot, A. W. Palmans, A. R. A.; Meijer, E. W. *Chem. - A Eur. J.* **2016**.
- (5) Mtangi, W.; Kiran, V.; Fontanesi, C.; Naaman, R. *J. Phys. Chem. Lett.* **2015**, *6* (24), 4916–4922.
- (6) Aragonès, A. C.; Aravena, D.; Cerdá, J. I.; Acís-Castillo, Z.; Li, H.; Real, J. A.; Sanz, F.; Hihath, J.; Ruiz, E.; Díez-Pérez, I. *Nano Lett.* **2016**, *16* (1), 218–226.
- (7) Chakrabarti, S.; Pal, A. J. *Appl. Phys. Lett.* **2014**, *104* (1), 13305.
- (8) Ellms, J. W.; Hauser, S. J. *J. Ind. Eng. Chem.* **1913**, *5* (11), 915–917.
